# Supplementary material
Source: bioRxiv or medRxiv preprint supplement (https://medrxiv.org/highwire/filestream/90968/field_highwire_adjunct_files/0/2020.07.20.20135202-1.pdf)
Supplement: Supplementary file [file 2020.07.20.20135202-1.pdf]

# Supplementary Data

| Sample       | D17S800  | D17S1320  | D17S1321 | D17S855    | D17S1323 | D17S1327 | D17S1326  | D17S1325  | D17S791  |
|--------------|----------|-----------|----------|------------|----------|----------|-----------|-----------|----------|
| P01          | 166      | 171       | 151      | 147        | 151      | 129      | 105       | 201       | 161      |
| P02          | 166      | 171       | 151      | 147        | 151      | 129      | 105       | 201       | 161      |
| P03          | 166      | 171       | 151      | 147        | 151      | 129      | 105       | 201       | 161      |
| P04          | 166      | 171       | 151      | 147        | 151      | 129      | 105       | 201       | 161      |
| P05          | 166      | 171       | 151      | 147        | 151      | 129      | 105       | 201       | 169      |
| P06          | 166      | 171       | 151      | 147        | 151      | 129      | 105       | 201       | 174      |
| P07          | 166      | 171       | 151      | 147        | 151      | 129      | 105       | 197       | 161      |
| P08          | 166      | 171       | 151      | 147        | 151      | 129      | 105       | 202       | 161      |
| P09          | 166      | 171       | 151      | 147        | 150      | 129      | 105       | 201       | 161      |
| P10          | 166      | 171       | 151      | 149        | 151      | 129      | 105       | 201       | 161      |
| P11          | 166      | 171       | 150      | 147        | 151      | 129      | 105       | 201       | 161      |
| P12          | 166      | 171       | 150      | 147        | 151      | 129      | 105       | 201       | 161      |
| P13          | 166      | 171       | 148      | 147        | 151      | 129      | 105       | 201       | 161      |
| P14          | 166      | 171       | 151      | 147        | 151      | 129      | 105       | 199       | 180      |
| P15          | 166      | 171       | 151      | 147        | 151      | 129      | 103       | 201       | 175      |
| P16          | 166      | 171       | 151      | 147        | 151      | 129      | 103       | 199       | 161      |
| P17          | 166      | 171       | 150      | 147        | 151      | 129      | 105       | 201       | 174      |
| P18          | 166      | 171       | 149      | 147        | 151      | 129      | 105       | 201       | 176      |
| P19          | 166      | 171       | 152      | 147        | 151      | 129      | 105       | 201       | 174      |
| P20          | 166      | 171       | 150      | 147        | 151      | 129      | 105       | 201       | 174      |
| P21          | 166      | 171       | 150      | 147        | 151      | 129      | 105       | 201       | 174      |
| P22          | 166      | 171       | 150      | 147        | 151      | 129      | 105       | 193       | 161      |
| P23          | 166      | 171       | 150      | 147        | 151      | 128      | 105       | 201       | 161      |
| P24          | 170      | 171       | 151      | 144        | 151      | 129      | 105       | 201       | 161      |
| P25          | 170      | 171       | 150      | 147        | 151      | 129      | 105       | 201       | 161      |
| P26          | 166      | 171       | 151      | 147        | 151      | 129      | 103       | 199       | 176      |
| P27          | 166      | 171       | 151      | 147        | 150      | 129      | 104       | 201       | 174      |
| P28          | 170      | 171       | 151      | 147        | 150      | 128      | 105       | 201       | 161      |
| P29          | 166      | 171       | 151      | 145        | 151      | 129      | 105       | 199       | 186      |
| P30          | 166      | 171       | 150      | 147        | 151      | 129      | 103       | 199       | 182      |
| P31          | 166      | 171       | 149      | 147        | 151      | 128      | 103       | 201       | 177      |
| freq_control | 0.51     | 0.55      | 0.1      | 0.34       | 0.52     | 0.61     | 0.09      | 0.01      | 0.25     |
| freq_case    | 0.726    | 0.823     | 0.306    | 0.71       | 0.774    | 0.806    | 0.468     | 0.468     | 0.29     |
| P-value      | 0.01069  | 0.0007361 | 0.002219 | 0.00001009 | 0.002147 | 0.01458  | 1.014E-07 | 1.422E-12 | 0.7025   |
| Mb           | 2.141551 | 0.417813  | 0.244314 | 0.006935   | 0.040235 | 0.177651 | 0.187296  | 0.337722  | 3.658456 |

**Table S1. Most likely haplotype analysis of BRCA1 c.5470\_5477delATTGGCA mutation patinets carriers**

The numbers equal to the amplicon size containing the STR markers.

The parts of the likely ancestral haplotype shared by all patients are indicated in shades.

freq\_case/control: frequency of the allele shared by the patients and the control sample;

Mb: Physical distance in Mb obtained from UCSC Genome Browser.

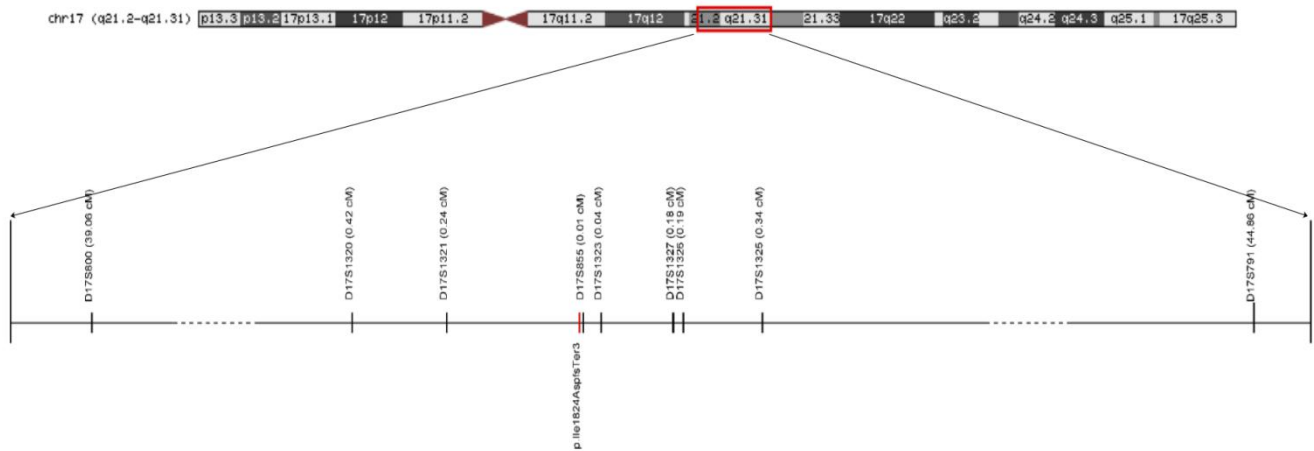

Supplementary Figure S1. Genetic map of the nine STR markers used in the haplotype analysis of BRCA1:c.5470\_5477del (p.Ile1824AspfsTer3).

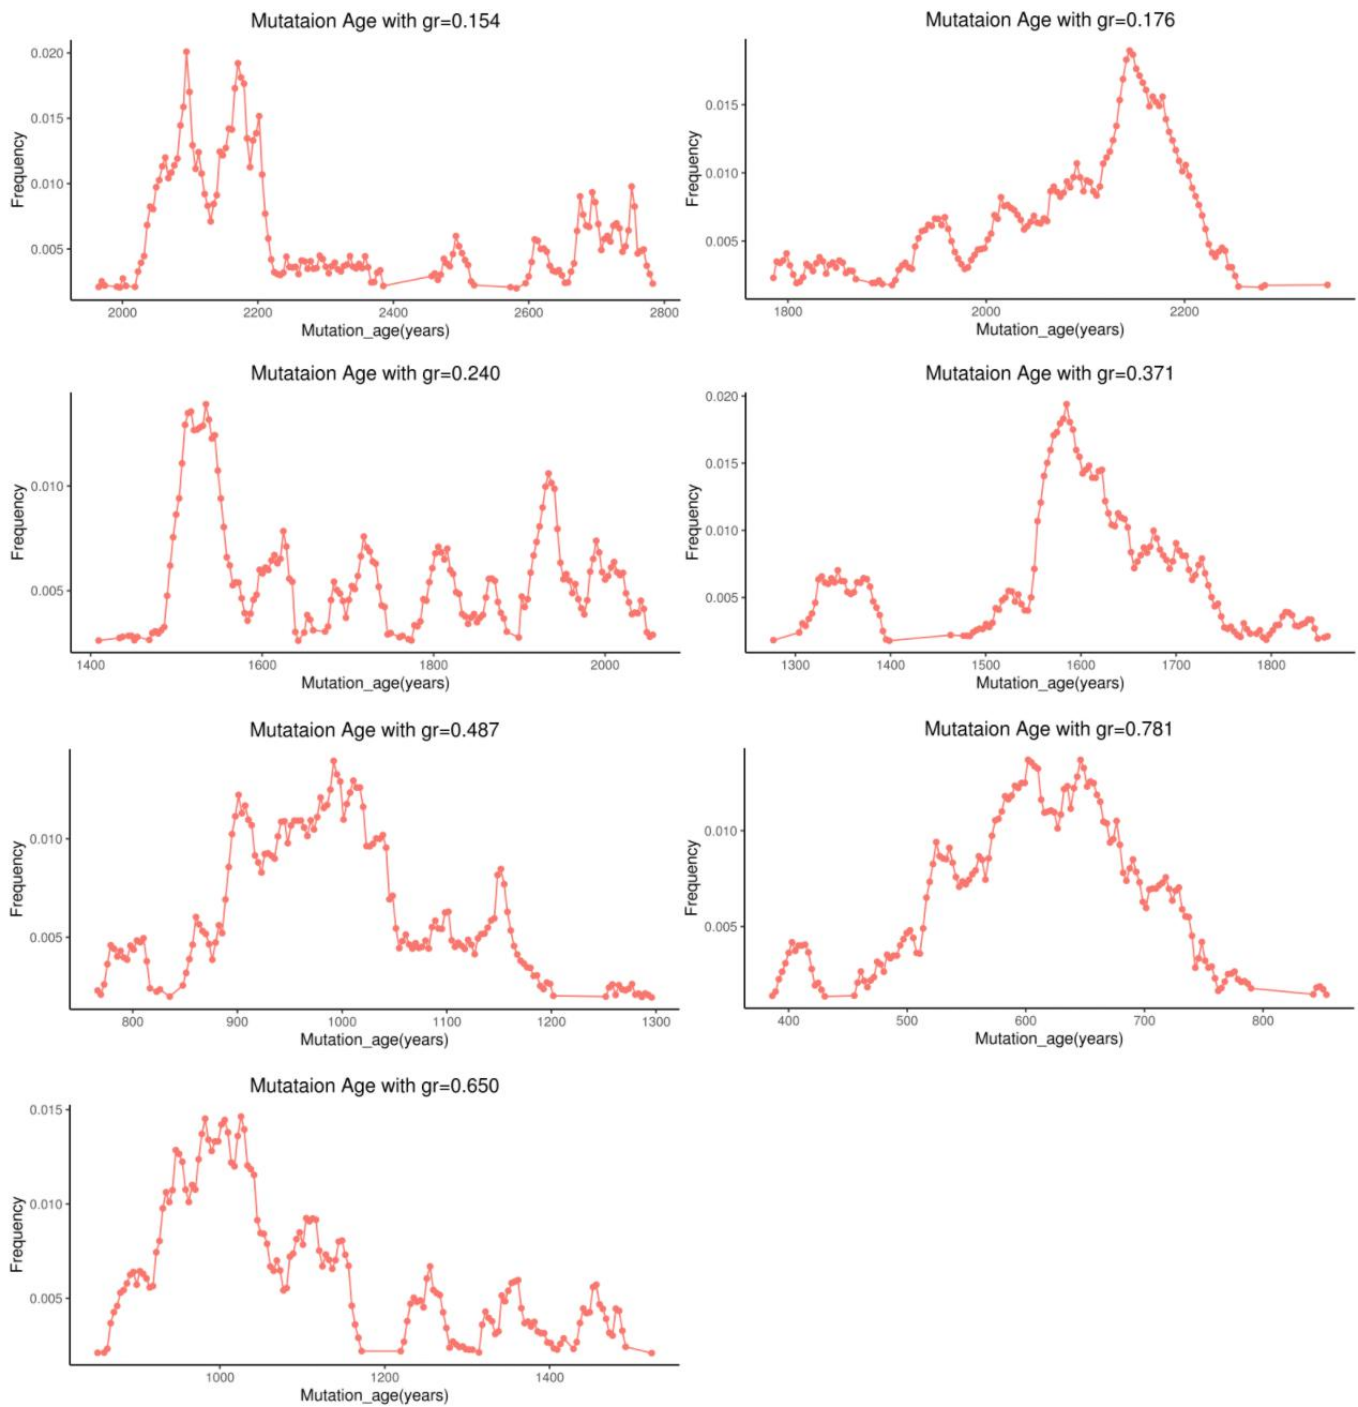

Supplementary Figure S2. Age estimation of BRCA1:c.5470\_5477del. Seven different growth rates (gr, %) were used together with the haplotype profiles as input to DMLE+2.3, and a distribution of mutation age vs probability (frequency) was estimated for each simulation. Highest probability was achieved at gr = 0.154%, for which the estimated mutation age was 2090 years.
